# Supplementary material for: Impact of chain morphology on the lubricity of surface-grafted polysaccharides
Source: Royal Society of Chemistry journal article supplement (doi:10.1039/c4ra01087f), 2014-01-01
Supplement: c4ra01087f1.pdf [file c4ra01087f1.pdf]

## Supplementary Information

| Liquid VASE Fit Layers | Thickness                    | Refractive Index        |
|------------------------|------------------------------|-------------------------|
| Dextran                | Measured                     | $1.51 + 0.01/\lambda^2$ |
| PAAm-g-PFPA            | Measured before spin-coating | $1.45 + 0.01/\lambda^2$ |
| Silicon oxide          | Measured before adsorption   | Built in to software    |
| Silicon substrate      | Infinite                     | Built in to software    |

**Table S1.** VASE multilayer model used to fit the dry measurements. As the refractive index formula indicates, the PAAm-g-PFPA and dextran layers are treated as Cauchy films.

| Liquid VASE Fit Layers                             | Thickness                        | Refractive Index               |
|----------------------------------------------------|----------------------------------|--------------------------------|
| Ambient water                                      | Infinite                         | 1.333                          |
| Dextran/water mixture (Bruggeman effective medium) | Measured                         | Measured mix of 1.51 and 1.333 |
| PAAm-g-PFPA                                        | Measured dry before spin-coating | $1.45 + 0.01/\lambda^2$        |
| Silicon oxide                                      | Measured dry before adsorption   | Built in to software           |
| Silicon substrate                                  | Infinite                         | Built in to software           |

**Table S2.** VASE multilayer model used to fit the liquid-cell measurements. As the refractive index formula indicates, the PAAm-g-PFPA layer is treated as a Cauchy film.

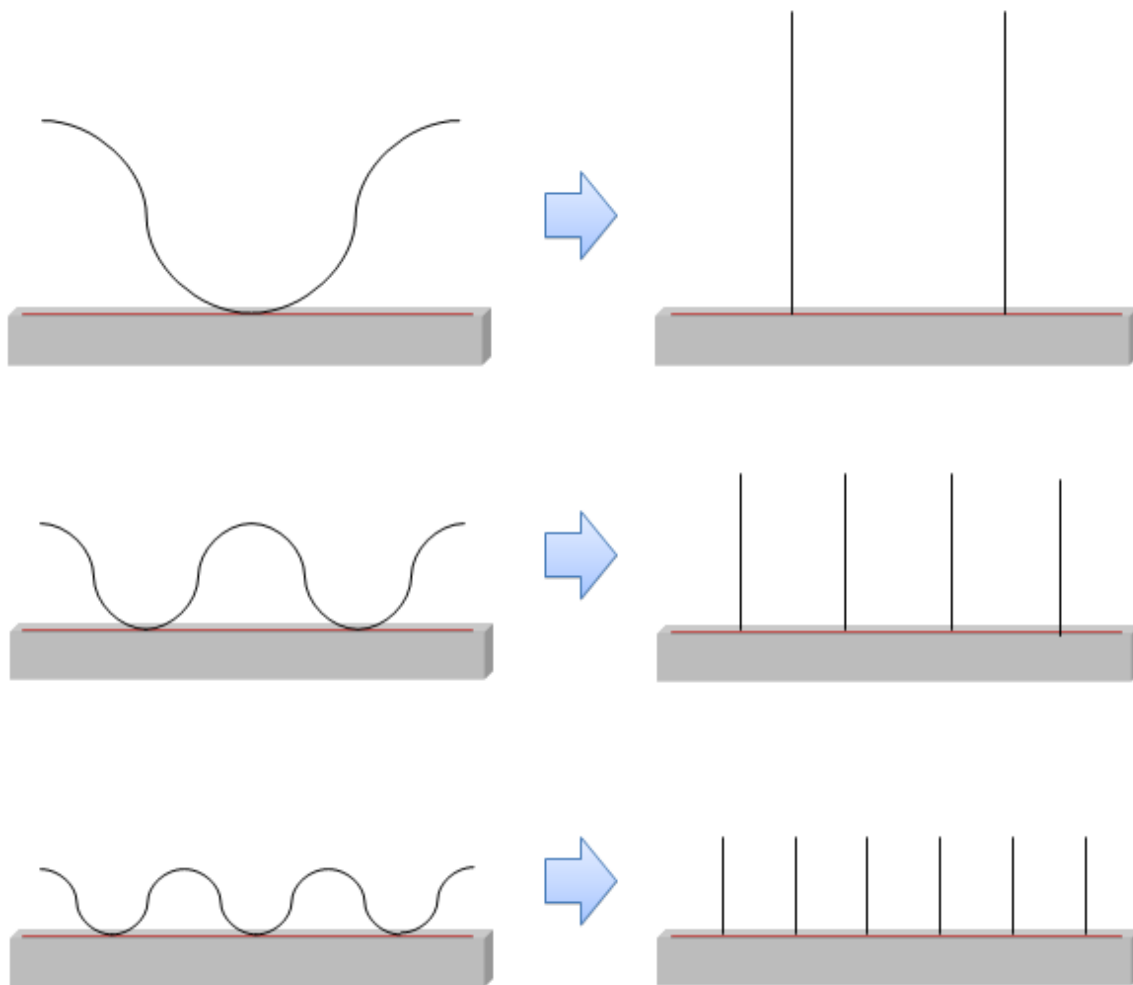

**Figure S1.** Schematic representation of the model used to calculate probable dextran attachment density. The 2 MDa dextran chain is attached to the substrate at either one, two, or three points, spaced such that the end and loop lengths are equal. These are then treated as discrete end-attached chains, and the height of the polymer brush of corresponding chain length and surface density is then calculated assuming that the chains are swollen to their hydrodynamic volume.
